# Supplementary material for: Auditory and Visual Response Inhibition in Children with Bilateral Hearing Aids and Children with ADHD
Source: MDPI journal article supplement (doi:10.3390/brainsci10050307), 2020-05-18
Supplement: s1 [file s1]

## Supplementary Material

**Table S1.** Hearing aid (HA) information for the HA group.

| HA user | Age at HL diagnosis: (years of age)                                                           | Age at first HA fitting: <i>M (SD)</i> (years of age) | HA use         |                       | Unaided pure-tone average threshold (0.5-4 kHz) |                |
|---------|-----------------------------------------------------------------------------------------------|-------------------------------------------------------|----------------|-----------------------|-------------------------------------------------|----------------|
|         |                                                                                               |                                                       | School day (h) | Out of school day (h) | Left ear (dB)                                   | Right ear (dB) |
| A       | For 9 children < 2.5, for 4 children between 3-4, and for 2 children between 5-9 years of age | 2.85 (2.29)                                           | 13             | 13                    | 55                                              | 51.9           |
| B       |                                                                                               |                                                       | 11             | 10                    | 63.5                                            | 61             |
| C       |                                                                                               |                                                       | 14             | 14                    | 65.5                                            | 73             |
| D       |                                                                                               |                                                       | 12             | 12                    | 49                                              | 44.5           |
| E       |                                                                                               |                                                       | 15             | 12                    | 50                                              | 50.5           |
| F       |                                                                                               |                                                       | 10             | 8                     | 36.5                                            | 35.5           |
| G       |                                                                                               |                                                       | 12.5           | 11                    | 44.5                                            | 43             |
| H       |                                                                                               |                                                       | 13             | 15                    | 75                                              | 75             |
| I       |                                                                                               |                                                       | 12             | 14                    | 62                                              | 57             |
| J       |                                                                                               |                                                       | 14.5           | 14.5                  | 98                                              | 97             |
| K       |                                                                                               |                                                       | 14.5           | 14.5                  | 70                                              | 72             |
| L       |                                                                                               |                                                       | 14             | 16                    | 96                                              | 80             |
| M       |                                                                                               |                                                       | 12             | 12                    | 66                                              | 75             |
| N       |                                                                                               |                                                       | 15.5           | 15.5                  | 105                                             | 91             |
| O       |                                                                                               |                                                       | 12.5           | 12.5                  | 71                                              | 76             |

Note: The demographic data for the HA group is listed. For information on age, descriptive information and a group average are presented to ensure anonymity. The audiometry indicated an average hearing loss in children with HAs as follows: right ear: 55.33 dB for 0.25 kHz, 59 dB for 0.5 kHz, 63.5 for 1 kHz, 73.67 for 2 kHz, 69.46 for 3 kHz, 63 dB for 4 kHz, 66.43 for 6 kHz and 66.43 for 8 kHz; left ear: 51.33 dB for 0.25 kHz, 59.67 dB for 0.5 kHz, 65.67 for 1 kHz, 75.67 for 2 kHz, 68.08 for 3 kHz, 62.14 dB for 4 kHz, 67.14 for 6 kHz and 71.07 for 8 kHz. For an illustration of the audiometry see Figure S1. Abbreviations: HA, hearing aid/child (A-O) of the hearing aid group; M, mean; SD, standard deviation.

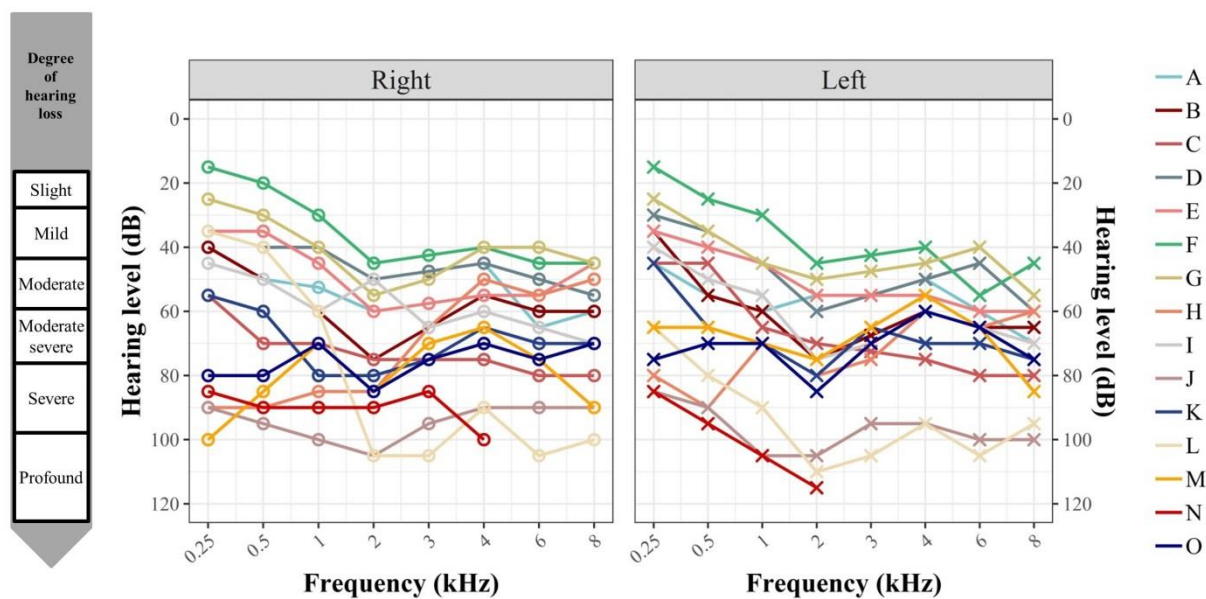

**Figure S1.** Unaided pure tone audiometry (air-conduction) of the right and left ear for each child (A-O) of the HA group.

**Table S2.** Uncorrected *t*-tests of the significant ( $p < 0.05$ ) contrasts of  $\Delta\text{HbO}$  in each condition against baseline.

|          | Ch      | Group | Brain region                       | <i>t</i> | df | <i>p</i> |
|----------|---------|-------|------------------------------------|----------|----|----------|
| Visual   | P1 Ch 4 | ADHD  | Left supramarginal gyrus           | 3.53     | 13 | 0.004    |
|          | P1 Ch 7 | TD    | Left DLPFC                         | -2.82    | 14 | 0.01     |
|          | P1 Ch 8 | TD    | Left primary somatosensory cortex  | 2.37     | 14 | 0.03     |
|          | P2 Ch1  | ADHD  | Right supramarginal gyrus          | 2.55     | 11 | 0.03     |
|          | P2 Ch2  | HA    | Right pre/SMA                      | 2.43     | 10 | 0.04     |
|          | P2 Ch6  | HA    | Right primary somatosensory cortex | 2.23     | 11 | 0.048    |
|          |         | ADHD  |                                    | 2.75     | 13 | 0.02     |
|          | P2 Ch9  | ADHD  | Right frontopolar cortex           | 2.35     | 14 | 0.03     |
|          | P2 Ch10 | ADHD  | Right primary auditory cortex      | 2.80     | 13 | 0.02     |
|          | P2 Ch15 | TD    | Right STG                          | 2.57     | 14 | 0.02     |
|          | P2 Ch13 | ADHD  | Right frontopolar cortex           | 2.39     | 12 | 0.03     |
|          | P2 Ch16 | TD    | Right STG                          | -2.39    | 13 | 0.03     |
|          | P2 Ch17 | HA    | Right IPFG                         | 3.43     | 9  | 0.008    |
|          | P2 Ch21 | TD    | Right temporopolar cortex          | -2.73    | 14 | 0.02     |
| Auditory | P1 Ch8  | ADHD  | Left primary somatosensory cortex  | 2.23     | 12 | 0.046    |
|          | P2 Ch1  | ADHD  | Right supramarginal gyrus          | 3.17     | 11 | 0.009    |
|          | P2 Ch5  | ADHD  | Right supramarginal gyrus          | 2.60     | 12 | 0.02     |
|          | P2 Ch6  | ADHD  | Right primary somatosensory cortex | 4.17     | 13 | 0.001    |
|          | P2 Ch10 | ADHD  | Right primary auditory cortex      | 2.79     | 13 | 0.02     |
|          | P2 Ch18 | ADHD  | Right frontopolar cortex           | 2.30     | 14 | 0.04     |
|          | P2 Ch21 | TD    | Right temporopolar cortex          | -2.74    | 14 | 0.02     |

Abbreviations: HA, hearing aid; ADHD; attention deficit/hyperactivity disorder; TD, typically developing; P, probe; Ch, channel; IPFG, inferior prefrontal gyrus; STG, superior temporal gyrus; MTG, medial temporal gyrus; pre/SMA, pre-motor and supplementary motor area.

**Table S3.** Uncorrected *t*-tests of the significant ( $p < 0.05$ ) contrasts of  $\Delta\text{HbR}$  in each condition against baseline.

|          | Ch      | Group | Brain region                      | <i>t</i> | df | <i>p</i> |
|----------|---------|-------|-----------------------------------|----------|----|----------|
| Visual   | P1 Ch7  | HA    | Left DLPFC                        | 2.31     | 11 | 0.04     |
|          |         | ADHD  |                                   | 3.59     | 12 | 0.004    |
|          | P1 Ch8  | HA    | Left primary somatosensory cortex | -2.25    | 11 | 0.046    |
|          | P1 Ch12 | ADHD  | Left pre/SMA                      | 3.42     | 14 | 0.004    |
|          | P1 Ch16 | ADHD  | Left pars opercularis             | 3.05     | 12 | 0.01     |
|          | P1 Ch17 | ADHD  | Left STG                          | 2.21     | 14 | 0.04     |
|          | P1 Ch18 | TD    | Left STG                          | 2.62     | 13 | 0.02     |
|          | P2 Ch2  | HA    | Right pre/SMA                     | -2.91    | 10 | 0.02     |
|          | P2 Ch9  | TD    | Right frontopolar cortex          | 2.24     | 14 | 0.04     |
|          | P2 Ch14 | TD    | Right STG                         | 2.46     | 14 | 0.03     |
|          | P2 Ch16 | ADHD  | Right STG                         | 3.42     | 12 | 0.03     |
|          | P2 Ch17 | HA    | Right IPFG                        | -2.47    | 9  | 0.04     |
| Auditory | P1 Ch3  | ADHD  | Left pre/SMA                      | 2.34     | 11 | 0.04     |
|          | P1 Ch7  | ADHD  | Left DLPFC                        | 3.25     | 12 | 0.007    |
|          | P1 Ch16 | ADHD  | Left pars opercularis             | 3.42     | 12 | 0.005    |
|          | P1 Ch17 | TD    | Left STG                          | -3.57    | 14 | 0.003    |
|          | P2 Ch3  | HA    | Right DLPFC                       | -2.51    | 7  | 0.04     |
|          |         | ADHD  |                                   | 2.99     | 12 | 0.01     |
|          | P2 Ch20 | HA    | Right MTG                         | -2.30    | 10 | 0.04     |
|          |         | TD    |                                   | -2.39    | 14 | 0.03     |

Abbreviations: HA, hearing aid; ADHD; attention deficit/hyperactivity disorder; TD, typically developing; P, probe; Ch, channel; IPFG, inferior prefrontal gyrus; STG, superior temporal gyrus; MTG, medial temporal gyrus; pre/SMA, pre-motor and supplementary motor area.

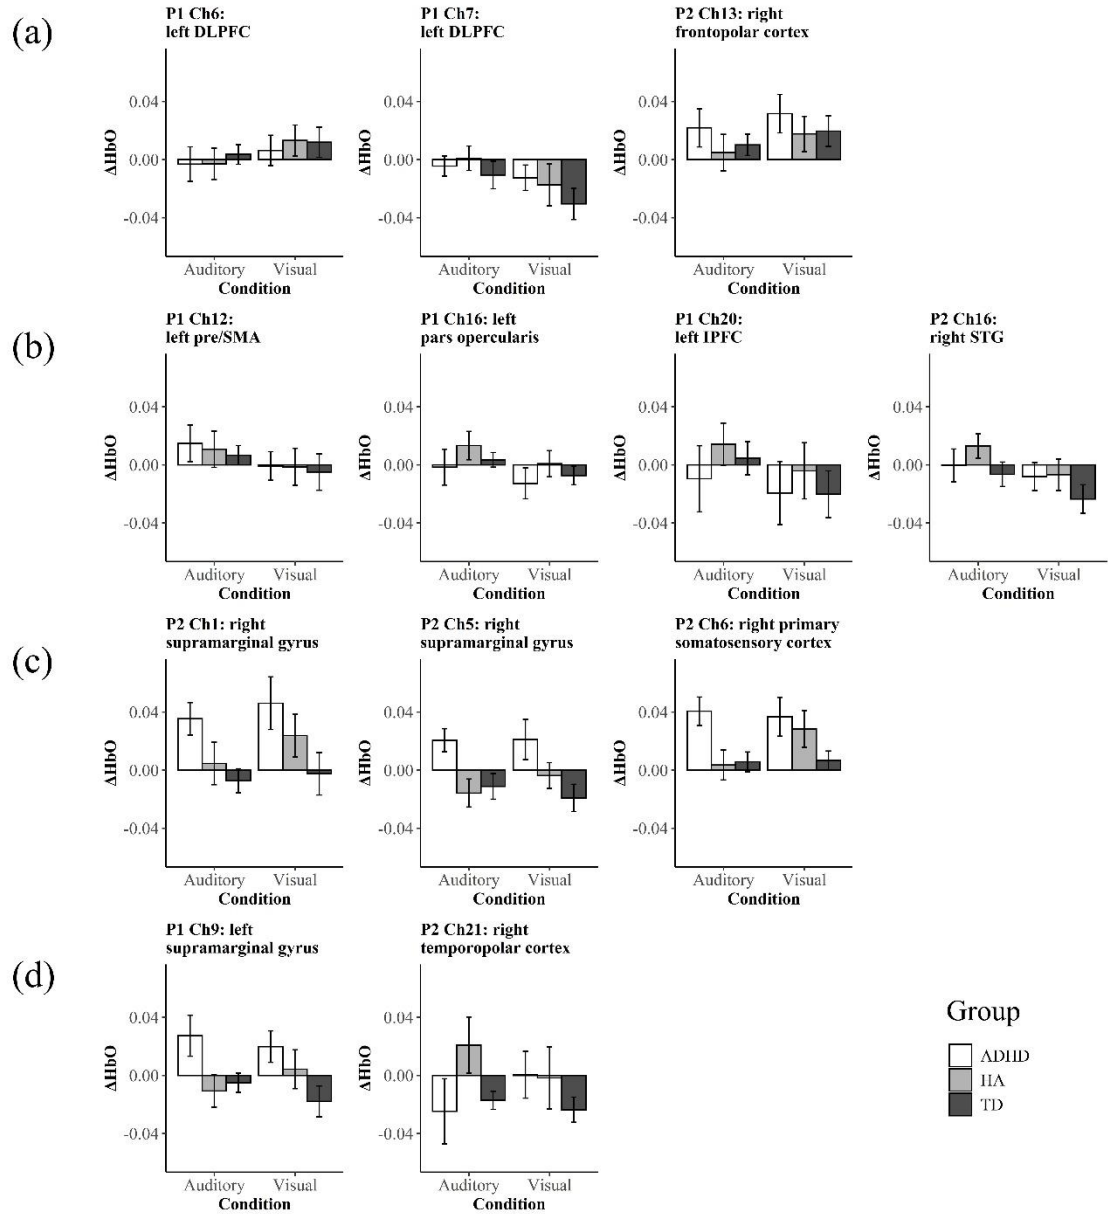

**Figure S2.** Effects of group (HA, ADHD, TD) and condition (auditory, visual) on  $\Delta\text{HbO}$ . All effects of (a) Condition: Visual > Auditory, (b) Condition: Auditory > Visual, (c) Group and (d) Group-by-condition on  $\Delta\text{HbO}$  are illustrated. Abbreviations: P, Probe set; Ch, channel; DLPFC, dorsolateral prefrontal cortex; pre/SMA, pre-motor and supplementary motor area; IPFC, inferior prefrontal gyrus; STG, superior temporal gyrus; HA, hearing aid, ADHD, attention deficit/hyperactivity disorder; TD, typically developing.

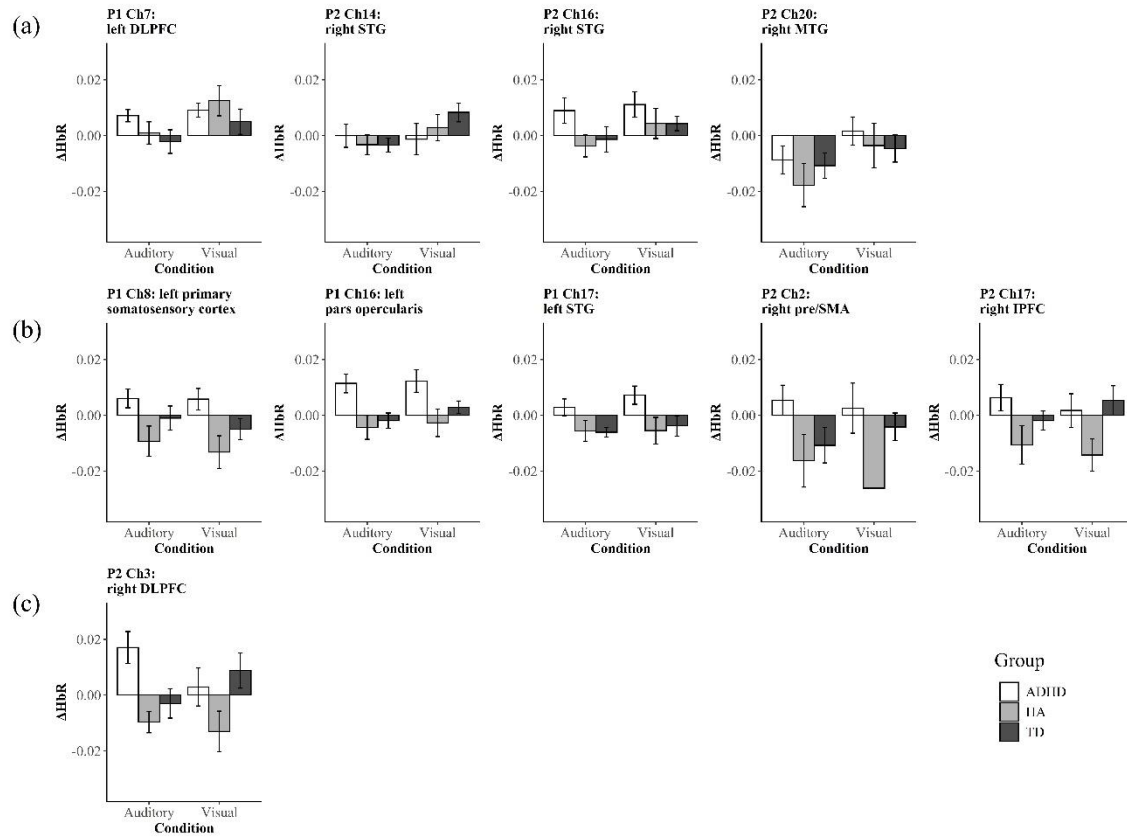

**Figure S3.** Effects of group (HA, ADHD, TD) and condition (auditory, visual) on  $\Delta HbR$ . All effects of A. Condition: Visual > Auditory, B. Group and C. Group-by-condition interactions on  $\Delta HbR$  are illustrated. Abbreviations: P, Probe set; Ch, channel; DLPFC, dorsolateral prefrontal cortex; MTG; medial temporal gyrus; pre/SMA, pre-motor and supplementary motor area; IPFG, inferior prefrontal gyrus; STG, superior temporal gyrus; HA, hearing aid; ADHD, attention deficit/hyperactivity disorder; TD, typically developing.

**Table S4.** Brain-behavior correlations

| Group | Chromophore | Condition | Channel | Brain region                         | Statistics             |
|-------|-------------|-----------|---------|--------------------------------------|------------------------|
| HA    | -           | -         | -       | -                                    | -                      |
| ADHD  | HbR         | visual    | P2 Ch20 | right MTG                            | $p=0.04$ , $r_s=0.53$  |
|       | HbR         | visual    | P1 Ch8  | left primary<br>somatosensory cortex | $p=0.02$ , $r_s=0.63$  |
| TD    | HbO         | auditory  | P1 Ch6  | left DLPFC                           | $p=0.01$ , $r_s=-0.66$ |
|       | HbR         | visual    | P2 Ch3  | right DLPFC                          | $p=0.007$ , $r_s=0.70$ |

Note: Spearman correlations per group (HA, ADHD, TD) and condition (auditory, visual) are listed. Abbreviations: HA, hearing aid; ADHD, attention deficit/hyperactivity disorder; TD, typically developing; HbR, deoxygenated hemoglobin; HbO, oxygenated hemoglobin; P, Probe set; Ch, channel; MTG, medial temporal gyrus; DLPFC, dorsolateral prefrontal cortex.
